# Supplementary material
Source: PubMed Central journal article supplement (PMC4715979)
Supplement: NIHMS741524-supplement-Supp_Table_S1.pdf [file NIHMS741524-supplement-Supp_Table_S1.pdf]

## Supplemental Table

### Immune molecules and antimicrobial activity in cervicovaginal lavage in the five different groups: HPV-negative, low-risk, intermediate-risk, high-risk (other than HPV16) and HPV16

| Variable (median [IQR])                                  | HPV Negative (n = 32)   | Low-risk HPV (n=33)   | Intermediate-risk HPV (n=14) | High-risk HPV (n=41)  | HPV16 (n=8)            | p-value |
|----------------------------------------------------------|-------------------------|-----------------------|------------------------------|-----------------------|------------------------|---------|
| <sup>a</sup> Protein (log <sub>10</sub> µg/mL) mean ± SD | 2.32 ± 0.31             | 2.31 ± 0.28           | 2.39 ± 0.33                  | 2.37 ± 0.37           | 2.45 ± 0.31            | 0.676   |
| IL-1α (pg/mL)                                            | 64 [24.1- 116.1]        | 42.4 [21.2- 300.1]    | 89.2 [20.7- 426.7]           | 97.2 [36.3- 275]      | 195.7 [102.6- 1234.1]  | 0.111   |
| <sup>a</sup> IL-1β (log <sub>10</sub> pg/mL)             | 0.45 ± 0.66             | 0.34 ± 0.67           | 0.59 ± 0.81                  | 0.57 ± 0.82           | 0.85 ± 1.09            | 0.446   |
| IL-1ra (pg/mL)                                           | 6822.3 [4398.1- 9588.4] | 5591.6 [1905.7- 8959] | 6170.7 [2042.2- 8676.9]      | 6446.0 [4516.6- 8319] | 8644.1 [7414.1- 10000] | 0.251   |
| <sup>b</sup> TNF, n (%)                                  | 16 (51.6%)              | 17 (54.8%)            | 5 (35.7%)                    | 21 (52.5%)            | 7 (87.5%)              | 0.241   |
| <sup>b</sup> IL-6, n (%)                                 | 16 (51.6%)              | 17 (54.8%)            | 9 (64.3%)                    | 27 (67.5%)            | 7 (87.5%)              | 0.333   |
| <sup>b</sup> IL-2, n (%)                                 | 3 (14.3%)               | 4 (15.4%)             | 2 (14.3%)                    | 8 (27.6%)             | 1 (20%)                | 0.755   |
| <sup>b</sup> IL-17, n (%)                                | 18 (64.3%)              | 19 (67.9%)            | 8 (57.1%)                    | 19 (51.4%)            | 6 (75%)                | 0.603   |
| <sup>b</sup> IFN-α2, n (%)                               | 0 (0%)                  | 0 (0%)                | 0 (0%)                       | 2 (6.9%)              | 0 (0%)                 | 0.573   |
| IFN-γ (pg/mL)                                            | 0.77 [0.32- 1.07]       | 0.51 [0.26- 1.28]     | 0.38 [0.13- 0.67]            | 0.71 [0.41- 1.63]     | 1.26 [0.53- 2.73]      | 0.119   |
| <sup>a</sup> IL-8 (log <sub>10</sub> pg/mL)              | 2.43 ± 0.85             | 2.45 ± 0.72           | 2.51 ± 0.65                  | 2.34 ± 0.75           | 2.91 ± 0.8             | 0.427   |
| <sup>b</sup> MIP-1α n (%)                                | 21 (67.7%)              | 18 (58.1%)            | 6 (57.1%)                    | 18 (45%)              | 4 (50%)                | 0.428   |
| <sup>b</sup> MIP-1β n (%)                                | 11 (35.5%)              | 11 (35.5%)            | 2 (14.3%)                    | 9 (22.5%)             | 2 (25%)                | 0.489   |
| <sup>b</sup> RANTES, n (%)                               | 18 (58.1%)              | 15 (48.4%)            | 8 (57.1%)                    | 20 (50%)              | 5 (62.5%)              | 0.904   |
| IgA (ng/mL)                                              | 933 [347- 3234]         | 1874 [455- 3054]      | 1607 [411- 3136]             | 1421 [412- 4139]      | 3084.5 [503.5- 4126.5] | 0.834   |
| IgG (ng/mL)                                              | 9899 [4421- 22150]      | 6350 [2119- 13290]    | 7592 [2763- 23149]           | 11522 [4926- 19125]   | 9509 [5008.5- 41907]   | 0.538   |
| Elafin (ng/mL)                                           | 100.1 [52-151.8]        | 97.7 [46.4- 238.6]    | 119.3 [9.8- 340.8]           | 43.9 [17.6- 190.7]    | 86.8 [54.6- 475.7]     | 0.544   |
| Lactoferrin (ng/ml)                                      | 410 [152- 1123]         | 356 [50- 758]         | 447.2 [393- 687]             | 334.1 [50- 694.7]     | 1000.6 [145- 3385.1]   | 0.585   |
| SLPI (pg/mL)                                             | 102950 [15225- 243259]  | 45583 [3750- 129463]  | 59808 [25646- 172065]        | 66402 [3750- 266049]  | 32120 [3750- 100875]   | 0.514   |
| <sup>a</sup> HNP1-3 (log <sub>10</sub> pg/mL)            | 5.15 ± 0.49             | 4.98 ± 0.63           | 5.11 ± 0.52                  | 4.86 ± 0.69           | 5.05 ± 0.85            | 0.373   |
| HBD-1 (pg/mL)                                            | 434.3 [148.5- 2594]     | 594.3 [176.2- 2010.9] | 392.6 [326.8- 538.4]         | 503 [210.5- 2317.9]   | 484.2 [253- 654.1]     | 0.948   |
| HBD-2 (pg/mL)                                            | 349.2 [142- 758.8]      | 387.6 [89.1- 1610.5]  | 728.4 [269.6- 2457.9]        | 812.9 [145.5- 2349.1] | 1794.0 [962.6- 6261.9] | 0.117   |
| <sup>b</sup> HBD-3, n (%)                                | 20 (62.5%)              | 21 (63.6%)            | 8 (66.7%)                    | 27 (65.9%)            | 4 (50%)                | 0.942   |
| E. coli inhibition (%)                                   | 22 [7- 34.5]            | 9 [1- 29]             | 14.5 [8- 68]                 | 10 [-7- 31]           | -4 [-19- 30.5]         | 0.119   |
| HSV inhibition (%)                                       | 23 [8.7- 48]            | 20 [7- 34]            | 13.5 [-11- 33]               | 29 [2- 45]            | 18 [12- 26]            | 0.559   |
| BaL inhibition (%)                                       | 57 [29- 91]             | 63.5 [34.5- 91]       | 59.5 [24.7- 78.5]            | 48 [9- 80.5]          | -18.2 [-125.8- 57.2]   | 0.095   |
| IIIb inhibition (%)                                      | 87 [64- 97]             | 91.5 [75.5- 99]       | 85.3 [37- 96]                | 84.7 [27- 96.7]       | 57.8 [22.3- 85]        | 0.041   |

<sup>a</sup>CVL protein, IL-1β, IL-8, and HNP1-3 were log<sub>10</sub> transformed and are presented as mean ± SD.

<sup>b</sup>CVL IL-6, IFN-α2, MIP-1α, MIP-1β, RANTES, IL-2, TNF, IL-17, and HBD-3 with > 25% of samples below the lower limit of detection (LLOD) were dichotomized at the LLOD and are presented as n(%) with detectable levels.
